# Supplementary material for: Volatile Compounds of Selected Raw and Cooked Brassica Vegetables
Source: PubMed Central journal article supplement (PMC6385023; doi:10.3390/molecules24030391), 2019-01-22
Supplement: molecules-24-00391-s001.pdf [file molecules-24-00391-s001.pdf]

**Table S1.** Main volatile compounds identified using GC × GC in raw and cooked broccoli varieties.

| Compound                          | IR   | Peak area (10 <sup>5</sup> ) |                 |                |                 |                |                  |               |  |            |  |               |
|-----------------------------------|------|------------------------------|-----------------|----------------|-----------------|----------------|------------------|---------------|--|------------|--|---------------|
|                                   |      | Malibu raw                   |                 | Malibu cooked  |                 | Covina raw     |                  | Covina cooked |  | '2970" raw |  | '2970" cooked |
| <b>Aldehydes</b>                  |      |                              |                 |                |                 |                |                  |               |  |            |  |               |
| Propanal                          | 517  | - ± -                        | 35,88 ± 1,3     | 74,05 ± 8      | 33,9 ± 20,69    | 208,78 ± 24,89 | 26,45 ± 3,31     |               |  |            |  |               |
| Butanal                           | 560  | - ± -                        | 9,9 ± 1,3       | 26,76 ± 2,68   | 9 ± 2,02        | 19,34 ± 0,67   | - ± -            |               |  |            |  |               |
| 2-butenal                         | 608  | - ± -                        | 85,4 ± 9,57     | 296,6 ± 2,64   | 112,29 ± 34,84  | 312,53 ± 46,52 | 35,41 ± 18,45    |               |  |            |  |               |
| 2-Pentenal, (E)-                  | 752  | 80,5 ± 3,86                  | 63,16 ± 8,31    | 359,1 ± 16,6   | 73,42 ± 23,21   | 197,91 ± 61,73 | 78,16 ± 7,72     |               |  |            |  |               |
| 3-Hexenal, (Z)-                   | 795  | 157 ± 14,81                  | 0 ± 0           | 121,9 ± 1,55   | - ± -           | 61,05 ± 9,97   | - ± -            |               |  |            |  |               |
| Hexanal                           | 797  | 772 ± 66,61                  | 216,8 ± 44,81   | 693,4 ± 94,9   | 270,05 ± 48,25  | 634,76 ± 40,78 | 297,34 ± 43,28   |               |  |            |  |               |
| 2-Hexenal                         | 852  | 471 ± 52,3                   | 61,95 ± 20,11   | 787,5 ± 65,2   | 100,1 ± 16,53   | 1471,41 ± 736  | 171,35 ± 36,82   |               |  |            |  |               |
| 2,4-Hexadienal, (E,E)-            | 898  | 83,9 ± 13,19                 | - ± -           | 88,97 ± 15,7   | - ± -           | 43,14 ± 23,28  | 2,51 ± 1,84      |               |  |            |  |               |
| Heptanal                          | 900  | 18,3 ± 2,99                  | 29,93 ± 5,74    | 50,28 ± 2,56   | 52,04 ± 7,54    | 43,19 ± 4,99   | 34,01 ± 6,72     |               |  |            |  |               |
| 2-heptanal                        | 959  | - ± -                        | 72,84 ± 12,36   | 26,6 ± 0,31    | 110,38 ± 50,71  | 26,24 ± 1,5    | 37,69 ± 25,31    |               |  |            |  |               |
| Benzaldehyde                      | 972  | 73,9 ± 25,21                 | 17,38 ± 2,49    | 329,3 ± 20,3   | 34,11 ± 5,92    | 182,26 ± 37,4  | 20,41 ± 5,72     |               |  |            |  |               |
| 2,4-Heptadienal, (E,E)-           | 993  | 286 ± 87,17                  | 35,8 ± 7,36     | 506,6 ± 32,9   | 60,31 ± 24,71   | 357,96 ± 81,01 | 30,98 ± 14,58    |               |  |            |  |               |
| Octanal                           | 1008 | 4,89 ± 0,08                  | - ± -           | 23,61 ± 1,47   | - ± -           | 12,27 ± 1,16   | - ± -            |               |  |            |  |               |
| Benzeneacetaldehyde               | 1055 | 172 ± 20,78                  | 16,28 ± 6,17    | 255,9 ± 7,63   | 20,57 ± 1,51    | 173,95 ± 8,98  | 21,95 ± 7,43     |               |  |            |  |               |
| 2-Octenal, (E)-                   | 1064 | - ± -                        | 44,11 ± 11,1    | 69,74 ± 6      | 37,15 ± 17,22   | 33,64 ± 0,5    | 24,83 ± 10,01    |               |  |            |  |               |
| Nonanal                           | 1108 | 29,9 ± 0,97                  | 110,96 ± 47,88  | 90,86 ± 4,84   | 172,55 ± 21,09  | 55,46 ± 4,21   | 114,46 ± 14,5    |               |  |            |  |               |
| <b>Total</b>                      | -    | <b>2149,23</b>               | <b>800,37</b>   | <b>3801,14</b> | <b>1085,88</b>  | <b>3833,89</b> | <b>895,54</b>    |               |  |            |  |               |
| <b>Isothiocyanates</b>            |      |                              |                 |                |                 |                |                  |               |  |            |  |               |
| Allyl isothiocyanate              | 871  | - ± -                        | - ± -           | ±              | - ± -           | - ± -          | 1,14 ± 0,11      |               |  |            |  |               |
| Butane, 2-isothiocyanato-         | 932  | - ± -                        | - ± -           | ±              | - ± -           | - ± -          | 0,77 ± 0,07      |               |  |            |  |               |
| Isobutyl isothiocyanate           | 957  | 2,8 ± 0,02                   | - ± -           | - ± -          | - ± -           | 1,78 ± 0,3     | 1,71 ± 0,13      |               |  |            |  |               |
| Hexane, 1-isocyanato-             | 971  | 0,47 ± 0,01                  | - ± -           | 0,56 ± 0,05    | - ± -           | 0,38 ± 0,12    | 0,63 ± 0,02      |               |  |            |  |               |
| 1-Butene, 4-isothiocyanato-       | 998  | - ± -                        | 8,29 ± 0,66     | - ± -          | 2,48 ± 1,06     | - ± -          | 3,77 ± 0,13      |               |  |            |  |               |
| Cyclopentyl isothiocyanate        | 1003 | 2,9 ± 1,02                   | - ± -           | 0,61 ± 0,25    | - ± -           | 1,36 ± 1,63    | - ± -            |               |  |            |  |               |
| Butane, 1-isothiocyanato-         | 1004 | - ± -                        | 2,26 ± 0,67     | - ± -          | 3,84 ± 1,13     | - ± -          | 3,54 ± 0,1       |               |  |            |  |               |
| 2-Methylbutyl isothiocyanate      | 1066 | - ± -                        | 12,07 ± 3,37    | - ± -          | - ± -           | - ± -          | 2,66 ± 0,22      |               |  |            |  |               |
| Benzene, (2-isothiocyanatoethyl)- | 1461 | - ± -                        | 5,18 ± 1,29     | - ± -          | 0,36 ± 0,18     | - ± -          | 0,7 ± 0,46       |               |  |            |  |               |
| Propane, 1-isothiocyanato-        | 1484 | 17,6 ± 0,74                  | 2,42 ± 0,85     | - ± -          | 0,18 ± 0,03     | 5,26 ± 0,94    | 4,66 ± 0,26      |               |  |            |  |               |
| <b>Total</b>                      | -    | <b>23,77</b>                 | <b>30,22</b>    | <b>1,14</b>    | <b>6,86</b>     | <b>8,78</b>    | <b>22,23</b>     |               |  |            |  |               |
| <b>Other sulfur compounds</b>     |      |                              |                 |                |                 |                |                  |               |  |            |  |               |
| Sulfides (di, tri, tetra, penta)  | -    | 349 ± 58,82                  | 794,36 ± 157,96 | 366,1 ± 81,5   | 1030,59 ± 380,9 | 593,39 ± 175,4 | 1497,75 ± 113,25 |               |  |            |  |               |
| Thiocyanic acid, methyl ester     | 709  | 316 ± 45,88                  | 6,84 ± 1,14     | 536,1 ± 45,5   | 9,84 ± 1,1      | 577,47 ± 71,55 | 19,28 ± 5,83     |               |  |            |  |               |
| Thiophene, 2-methyl-              | 771  | 1,17 ± 0,16                  | 0,91 ± 0,42     | 3,13 ± 0,21    | 2,08 ± 1,17     | 3,32 ± 1,45    | 3,16 ± 0,04      |               |  |            |  |               |
| Thiophene, 2-ethyl-               | 869  | 106 ± 15,69                  | 29,8 ± 15,26    | 60,17 ± 1,44   | 60,31 ± 23,17   | 76,89 ± 7,53   | - ± -            |               |  |            |  |               |
| Thiophene, 2-pentyl-              | 1170 | 0,57 ± 0,07                  | - ± -           | 0,3 ± 0,02     | - ± -           | 0,53 ± 0,46    | ±                |               |  |            |  |               |
| <b>Total</b>                      | -    | <b>772,22</b>                | <b>831,91</b>   | <b>956,86</b>  | <b>1102,83</b>  | <b>1251,60</b> | <b>1520,19</b>   |               |  |            |  |               |
| <b>Nitriles</b>                   |      |                              |                 |                |                 |                |                  |               |  |            |  |               |
| Butanenitrile, 3-methyl-          | 728  | - ± -                        | - ± -           | 23,3 ± 28      | - ± -           | - ± -          | - ± -            |               |  |            |  |               |
| Pentanenitrile, 4-methyl-         | 867  | 10,4 ± 2,61                  | - ± -           | - ± -          | - ± -           | - ± -          | - ± -            |               |  |            |  |               |
| Hexanenitrile                     | 876  | 11 ± 4,31                    | - ± -           | 22,61 ± 1,32   | - ± -           | 21,75 ± 13,46  | 6,7 ± 0,17       |               |  |            |  |               |
| Hexanenitrile, 5-methyl-          | 945  | 14,6 ± 3,38                  | - ± -           | 5,63 ± 0,32    | - ± -           | 25,3 ± 14,46   | 10,72 ± 0,79     |               |  |            |  |               |

|                                 |      |                |               |                |                |                 |                |
|---------------------------------|------|----------------|---------------|----------------|----------------|-----------------|----------------|
| Heptanenitrile                  | 981  | 12,5 ± 2,14    | 4,09 ± 0,94   | 58,59 ± 4,46   | 2,42 ± 3,2     | 50,26 ± 16,77   | 12,1 ± 4,05    |
| Benzyl nitrile                  | 1150 | 1,22 ± 0,23    | - ± -         | - ± -          | - ± -          | - ± -           | - ± -          |
| Octanenitrile                   | 1185 | - ± -          | - ± -         | 1,32 ± 1,12    | - ± -          | - ± -           | 0 ± 0          |
| Pentanenitrile, 5-(methylthio)- | 1209 | - ± -          | 7,7 ± 9,67    | 3,12 ± 0,37    | 11,19 ± 6,44   | 2,28 ± 1,57     | 31,96 ± 6,16   |
| Benzenepropanenitrile           | 1250 | 47 ± 11,72     | - ± -         | 79,59 ± 4,27   | - ± -          | 28,05 ± 16,51   | - ± -          |
| <b>Total</b>                    | -    | <b>96,72</b>   | <b>11,78</b>  | <b>194,16</b>  | <b>13,61</b>   | <b>127,64</b>   | <b>61,47</b>   |
| <b>Alcohols</b>                 |      |                |               |                |                |                 |                |
| 1-penten-3-ol                   | 664  | 487 ± 12,15    | 27,2 ± 6,63   | 866,4 ± 207    | 24,53 ± 4,17   | 472,77 ± 0      | 28,8 ± 6,46    |
| 1-pentanol                      | 763  | 5,37 ± 1,24    | 297,69 ± 48,9 | 101,3 ± 26,1   | 235,85 ± 36,82 | 14,26 ± 0,5     | 170,2 ± 9,83   |
| 2-penten-1-ol                   | 765  | 216 ± 67,95    | - ± -         | 457,1 ± 123    | - ± -          | 232,84 ± 63,22  | - ± -          |
| 2-hexen-1-ol                    | 864  | 11,3 ± 3,34    | - ± -         | 151,5 ± 91     | - ± -          | 96,18 ± 27,05   | - ± -          |
| 1-hexenol                       | 867  | 129 ± 7,58     | - ± -         | 417 ± 102      | - ± -          | 520,61 ± 163,8  | - ± -          |
| 1-octen-3-ol                    | 986  | 27,6 ± 3,89    | - ± -         | - ± -          | - ± -          | 68,98 ± 32,27   | - ± -          |
| <b>Total</b>                    | -    | <b>876,77</b>  | <b>324,89</b> | <b>1993,25</b> | <b>230,38</b>  | <b>1405,64</b>  | <b>199,00</b>  |
| <b>Other compounds</b>          |      |                |               |                |                |                 |                |
| 1-penten-3-one                  | 670  | 563 ± 49,01    | 101,6 ± 10,76 | 411,6 ± 185    | 112,13 ± 27,11 | 266,97 ± 2,65   | 112,54 ± 28,39 |
| Furan, 2-ethyl                  | 695  | 983 ± 146,2    | - ± -         | 806 ± 18,5     | - ± -          | 1214,99 ± 310,2 | 796,79 ± 51,94 |
| furan, 2-pentyl                 | 996  | 47,5 ± 9,73    | 0,62 ± 0,28   | 182,2 ± 3,05   | 0,62 ± 0,22    | 145,14 ± 19,89  | 358,1 ± 61,91  |
| 3,5-octadien-2-one              | 1073 | 32,3 ± 18,19   | - ± -         | 277 ± 221      | - ± -          | 87,83 ± 96,66   | 28,28 ± 3,03   |
| <b>Total</b>                    | -    | <b>1625,54</b> | <b>102,22</b> | <b>1676,69</b> | <b>112,75</b>  | <b>1714,93</b>  | <b>1295,70</b> |

**Table S2.** Main volatile compounds identified using GC × GC in raw and cooked cauliflower varieties.

| Compound                | IR   | Peak area (10 <sup>5</sup> ) |                |               |                |                |                  |
|-------------------------|------|------------------------------|----------------|---------------|----------------|----------------|------------------|
|                         |      | Oviedo raw                   | Oviedo cooked  | Liria raw     | Liria cooked   | Charlotte raw  | Charlotte cooked |
| <b>Aldehydes</b>        |      |                              |                |               |                |                |                  |
| 2-Propenal              | 514  | 55,68 ± 7,36                 | 6,39 ± 0,5     | 70,03 ± 42,77 | 6,71 ± 2,66    | 52,24 ± 17,39  | 31,62 ± 7,06     |
| Propanal                | 517  | 140,9 ± 39,27                | - ± -          | - ± -         | - ± -          | 394,8 ± 27,62  | - ± -            |
| Butanal                 | 561  | 38,95 ± 3,66                 | 5,68 ± 1,97    | 79,34 ± 16,24 | 9,69 ± 3,62    | 38,01 ± 17,34  | 25,6 ± 7,4       |
| 2-Butenal               | 607  | 141 ± 17,32                  | 33,05 ± 15,32  | 236,2 ± 47,68 | 179,69 ± 39,89 | 550,2 ± 585,65 | 71,45 ± 17,04    |
| Butanal, 3-methyl-      | 619  | 46,89 ± 3,42                 | 2,58 ± 0,83    | 38,08 ± 7,28  | 15,28 ± 2,22   | 70,93 ± 51,04  | 18,07 ± 0,29     |
| Butanal, 2-methyl-      | 631  | - ± -                        | 8,92 ± 1,84    | - ± -         | 38,53 ± 5,73   | - ± -          | 63,57 ± 10,89    |
| Pentanal                | 670  | - ± -                        | 355,96 ± 78,55 | - ± -         | 331,94 ± 57,81 | - ± -          | 136,9 ± 86,68    |
| 2-Pentenal, (E)-        | 752  | 322,4 ± 9,09                 | 45,13 ± 2,93   | 300,9 ± 63,77 | 88,69 ± 8,04   | 239,8 ± 5,57   | 173,3 ± 19,79    |
| 3-Hexenal, (Z)-         | 759  | 108,8 ± 1,18                 | - ± -          | 104 ± 42,6    | 0 ± 0          | 48,3 ± 8,48    | 0 ± 0            |
| Heksanal                | 797  | 19,67 ± 2,25                 | 415,63 ± 83    | 314,2 ± 155,2 | 101,45 ± 13,54 | 794,2 ± 193,56 | 779,5 ± 115,16   |
| 2-Hexenal               | 852  | 754,6 ± 56,39                | 53,88 ± 17,01  | 1106 ± 163,2  | 120,31 ± 17,93 | 236,3 ± 92,4   | 90,95 ± 21,91    |
| 2,4-Hexadienal, (E,E)-  | 898  | 59,94 ± 8,66                 | 2,21 ± 0,72    | 163,3 ± 51,34 | 6,47 ± 1,07    | 194,2 ± 25,05  | 12,06 ± 1,18     |
| Heptanal                | 901  | 163,4 ± 3,91                 | 41,87 ± 4,29   | 156,9 ± 45,44 | 80,34 ± 8,31   | 199,9 ± 25,9   | 133,3 ± 47,54    |
| 2-Heptenal, (Z)-        | 959  | 58,54 ± 7,54                 | 20,72 ± 13,35  | 66,83 ± 44,06 | 31,25 ± 7,33   | 159,6 ± 59,69  | 42,46 ± 8,96     |
| Benzaldehyde            | 972  | 284,8 ± 45,05                | 15,41 ± 0,88   | 410,5 ± 0,31  | 30,65 ± 1,5    | 703,6 ± 549,32 | 56 ± 8,04        |
| 2,4-Heptadienal, (E,E)- | 996  | 598,8 ± 82,1                 | 42,51 ± 12,52  | 871,6 ± 93,13 | 127,71 ± 58,68 | 711,2 ± 66,2   | 21,05 ± 4,62     |
| Octanal                 | 1008 | 98,34 ± 6,64                 | 62,57 ± 16,37  | 93,86 ± 2,47  | 98,45 ± 29,78  | 100,3 ± 47,64  | 123,2 ± 11,26    |

|                                           |          |                |                |                |                 |                |                |
|-------------------------------------------|----------|----------------|----------------|----------------|-----------------|----------------|----------------|
| Benzeneacetaldehyde                       | 1055     | 80,9 ± 2,48    | 5,12 ± 1,45    | 109,6 ± 69,73  | 7,69 ± 1,34     | 146,3 ± 12,19  | 20,89 ± 2,72   |
| 2-Octenal, (E)-                           | 1064     | 151,9 ± 42,37  | 15,53 ± 3,92   | 116,8 ± 18,22  | 36,59 ± 5,17    | 330,8 ± 104,34 | 44,34 ± 12,82  |
| Nonanal                                   | 1108     | 162,2 ± 16,56  | 219,33 ± 24,29 | 98,45 ± 44,36  | 201,66 ± 83,62  | 57,09 ± 16,32  | 132,3 ± 71,74  |
| 2,4-Octadienal, (E,E)-                    | 1119     | 5,36 ± 2,53    | - ± -          | 16,59 ± 8,22   | - ± -           | 14,68 ± 0,15   | - ± -          |
| 2-Nonenal, (E)-                           | 1164     | 19,43 ± 3,83   | - ± -          | 42,61 ± 26,05  | 11,25 ± 3,93    | 66,71 ± 36,23  | 50,58 ± 33,48  |
| Decanal                                   | 1209     | 24,16 ± 1,78   | 10,61 ± 0,36   | 26,77 ± 2,97   | 20,18 ± 7,79    | 66,68 ± 30,07  | 20,89 ± 10,13  |
| 2,4-Nonadienal, (E,E)-                    | 1222     | 21,45 ± 8,1    | - ± -          | 39,28 ± 4,9    | - ± -           | 84 ± 4,34      | 71,45 ± 17,04  |
| 2,4-Decadienal, (E,E)-                    | 1287     | - ± -          | 8,55 ± 4,3     | - ± -          | 41,06 ± 7,79    | - ± -          | 19,16 ± 14,31  |
| <b>Total</b>                              | <b>-</b> | <b>3357,94</b> | <b>1371,64</b> | <b>4461,94</b> | <b>1585,60</b>  | <b>5259,77</b> | <b>2123,63</b> |
| <b>Isothiocyanates</b>                    |          |                | ±              |                | ±               |                | ±              |
| allyl isothiocyanate                      | 871      | 79,45 ± 1,56   | 33,23 ± 8,03   | 205,8 ± 50,63  | 315,98 ± 39,64  | 212,3 ± 52,46  | 175,9 ± 16,92  |
| Isobutyl isothiocyanate                   | 957      | 2,84 ± 0,41    | 2,46 ± 0,78    | 102 ± 62,49    | 33,32 ± 4,03    | 6,66 ± 1,49    | 43,84 ± 1,21   |
| Cyclopropane, isothiocyanato-             | 966      | - ± -          | - ± -          | 7,98 ± 4,62    | 8,49 ± 1,45     | - ± -          | 13,03 ± 2,25   |
| 1-Butene, 4-isothiocyanato-               | 998      | - ± -          | 2,66 ± 0,61    | - ± -          | 23,12 ± 3,54    | - ± -          | 168,7 ± 89,06  |
| Cyclopentyl isothiocyanate                | 1003     | - ± -          | - ± -          | 17,98 ± 8,05   | 0 ± 0           | 9,25 ± 4,58    | 0 ± 0          |
| 2-Methylbutyl isothiocyanate              | 1066     | 6,09 ± 0,01    | 4,67 ± 1,55    | 12,91 ± 2,68   | 47,99 ± 2,1     | 9,53 ± 1,09    | 51,62 ± 5,59   |
| Propane, 1-isocyanato-2-methyl-           | 1348     | 1,19 ± 0,05    | ±              | - ± -          | 0 ± 0           | - ± -          | 0 ± 0          |
| Propane, 1-isothiocyanato-3-(methylthio)- | 1467     | 1,57 ± 0,94    | 2,22 ± 0,85    | 1,71 ± 0,76    | 44,35 ± 11,4    | 0,91 ± 0,37    | 16,03 ± 1,49   |
| Propane, 1-isothiocyanato-                | 1514     | - ± -          | 1,36 ± 0,65    | - ± -          | 7,12 ± 0,71     | - ± -          | 15,94 ± 5,87   |
| <b>Total</b>                              | <b>-</b> | <b>91,14</b>   | <b>46,6</b>    | <b>348,31</b>  | <b>480,37</b>   | <b>238,65</b>  | <b>485,05</b>  |
| <b>Other sulfides</b>                     |          |                |                |                |                 |                |                |
| Sulfides (di, tri, tetra, penta)          | -        | 694,6 ± 81,23  | 433,82 ± 27,63 | 1022 ± 134,5   | 841,46 ± 164,14 | 748,2 ± 394,87 | 1342 ± 115,01  |
| Thiocyanic acid, methyl ester             | 709      | 419,3 ± 12,53  | 4,56 ± 0,31    | 565,8 ± 43,09  | 20,12 ± 3,08    | 333,7 ± 28,15  | 48,15 ± 2,56   |
| Thiophene, 2-ethyl-                       | 869      | 136,3 ± 29,36  | - ± -          | 108,3 ± 18,56  | - ± -           | 188 ± 27,46    | - ± -          |
| Thiocyanic acid, 2-propenyl ester         | 873      | 3,34 ± 2,39    | 5,16 ± 1,47    | 4,42 ± 1,1     | 55,04 ± 7,84    | - ± -          | 50,24 ± 20,4   |
| S-Methyl pentanethioate                   | 998      | 1,88 ± 0,3     | - ± -          | 8,19 ± 1,48    | - ± -           | 3,58 ± 1,29    | - ± -          |
| S-Methyl methanethiosulphonate            | 1072     | 4,52 ± 3,33    | - ± -          | 4,9 ± 0,66     | - ± -           | - ± -          | - ± -          |
| <b>Total</b>                              | <b>-</b> | <b>1259,95</b> | <b>443,55</b>  | <b>1713,74</b> | <b>916,61</b>   | <b>1273,52</b> | <b>1440,71</b> |
| <b>Nitriles</b>                           |          |                |                |                |                 |                |                |
| 3-Butenenitrile                           | 621      | 660,2 ± 75,91  | - ± -          | 685,2 ± 186,4  | 0 ± 0           | - ± -          | 0 ± 0          |
| 2-butanenitrile                           | 622      | - ± -          | 4,16 ± 0,78    | - ± -          | 20,51 ± 2,9     | 710,7 ± 80,89  | 70,86 ± 10,81  |
| Butanenitrile, 3-methyl-                  | 728      | 51,37 ± 15,12  | 1,6 ± 0,24     | 159,6 ± 94,43  | - ± -           | 113,3 ± 99,12  | 20,39 ± 5,99   |
| Pentanenitrile, 4-methyl-                 | 840      | 31,09 ± 0,47   | - ± -          | 67,55 ± 18,31  | - ± -           | 77,73 ± 34,66  | 0 ± 0          |
| Hexanenitrile                             | 876      | 17,71 ± 2,13   | - ± -          | 26,11 ± 1,59   | - ± -           | 25,49 ± 7,64   | 0 ± 0          |
| Hexanenitrile, 5-methyl-                  | 945      | 2,25 ± 0,84    | - ± -          | 13,8 ± 3,17    | - ± -           | - ± -          | 0 ± 0          |
| Heptanenitrile                            | 981      | 8,28 ± 0,98    | - ± -          | - ± -          | - ± -           | - ± -          | 0 ± 0          |
| Butanenitrile, 4-(methylthio)-            | 1092     | 39,34 ± 2,07   | 27,95 ± 9,74   | 11,37 ± 5,09   | 121,8 ± 50,43   | 141,9 ± 192,45 | 205 ± 27,44    |
| Benzyl nitrile                            | 1150     | 3,23 ± 0,16    | - ± -          | 3,59 ± 0,23    | 0 ± 0           | - ± -          | 0 ± 0          |
| Pentanenitrile, 5-(methylthio)-           | 1209     |                | ±              |                | 2,67 ± 1,25     |                | 19,65 ± 1,22   |
| Benzenepropanenitrile                     | 1250     | 15,95 ± 0,12   | - ± -          | 8,37 ± 2,25    | 0 ± 0           | 26,03 ± 8,41   | 0 ± 0          |
| <b>Total</b>                              | <b>-</b> | <b>829,41</b>  | <b>33,72</b>   | <b>975,6</b>   | <b>144,97</b>   | <b>1095,14</b> | <b>315,89</b>  |
| <b>Alcohols</b>                           |          |                |                |                |                 |                |                |
| 1-Penten-3-ol                             | 664      | 633,9 ± 35,74  | 15,14 ± 1,85   | 319,9 ± 248,4  | 23,06 ± 6,51    | 361,2 ± 273,02 | 196,9 ± 43,08  |
| 1-Pentanol                                | 763      |                | ±              |                | 96,19 ± 14,66   |                | 954,3 ± 9,06   |
| 2-Penten-1-ol, (Z)-                       | 765      | 160,7 ± 84,83  | ±              | 397,7 ± 17,42  | 0 ± 0           | 284 ± 274,67   | 18,64 ± 4,23   |
| 1-Hexanol                                 | 867      | 369,1 ± 24,18  | ±              | 128,2 ± 17,31  | 0 ± 0           | 480 ± 326,76   | ±              |

|                            |      |                |                |                |                 |                |                |
|----------------------------|------|----------------|----------------|----------------|-----------------|----------------|----------------|
| 1-Octen-3-ol               | 986  | 228,7 ± 3,12   | 18,95 ± 14,87  | 309,4 ± 121,2  | 17,54 ± 3,23    | 215,6 ± 253,52 | 170,2 ± 41,5   |
| <b>Total</b>               | -    | <b>1392,47</b> | <b>34,09</b>   | <b>1155,21</b> | <b>136,76</b>   | <b>1340,75</b> | <b>1340,01</b> |
| <b>Other components</b>    |      |                | ±              |                | 0 ± 0           |                | 0 ± 0          |
| Furan, 2-ethyl-            | 695  | 947,7 ± 144,5  | 434,91 ± 75,31 | 1071 ± 581,2   | 823,65 ± 132,95 | 622,3 ± 374,47 | 1065 ± 79,74   |
| 3,5-Octadien-2-one, (E,E)- | 1073 | 272,5 ± 64,44  | 7,94 ± 1,59    | 369,3 ± 162,6  | 22,01 ± 7,42    | 375,6 ± 403,15 | 21,03 ± 1,27   |
| <b>Total</b>               | -    | <b>1220,2</b>  | <b>442,8</b>   | <b>1439,85</b> | <b>845,65</b>   | <b>997,87</b>  | <b>1084,68</b> |

**Table S3.** Main volatile compounds identified using GC × GC in raw and cooked kohlrabi varieties.

| Compound                                   | IR   | Peak area (10 <sup>5</sup> ) |               |              |                |             |              |              |                |
|--------------------------------------------|------|------------------------------|---------------|--------------|----------------|-------------|--------------|--------------|----------------|
|                                            |      | Konmar raw                   | Konmar cooked | Kolibri raw  | Kolibri cooked | Konan raw   | Konan cooked | Kordial raw  | Kordial cooked |
| <b>Aldehydes</b>                           |      |                              |               |              |                |             |              |              |                |
| 2-Butenal                                  | 608  | 12,9 ± 1,73                  | 27,5 ± 26,9   | 105,4 ± 5,67 | 3,03 ± 2,45    | 6,04 ± 0,66 | 5,37 ± 12,6  | 178 ± 104,35 | 68,2 ± 49,1    |
| Hexanal                                    | 795  | 3,2 ± 0,32                   | 248 ± 44,5    | 1,33 ± 0,22  | 102 ± 60,6     | 2,59 ± 0,56 | 42,7 ± 182   | 80,5 ± 13,37 | 118 ± 85       |
| Benzaldehyde                               | 972  | 4,95 ± 0,23                  | 17,2 ± 2,27   | 3,87 ± 0,11  | 4,76 ± 1,34    | 4,51 ± 0,09 | 2,87 ± 7,68  | 27,9 ± 35,69 | 22,2 ± 6,61    |
| Octanal                                    | 1008 | - ± -                        | 207 ± 19,7    | - ± -        | 27,2 ± 6,74    | 1,63 ± 0,17 | 14,4 ± 37,5  | 7,44 ± 1,94  | 28 ± 5,73      |
| Benzacetaldehyde                           | 1055 | 0,64 ± 0,38                  | 5,2 ± 1,7     | 3,76 ± 0,29  | 1,39 ± 0,19    | 1,16 ± 0,01 | 0,76 ± 1,27  | 45,7 ± 22,05 | 2,21 ± 1,04    |
| Nonanal                                    | 1108 | 18,4 ± 3,04                  | 326 ± 70,5    | 8,76 ± 0,75  | 83 ± 6,1       | 20,8 ± 0,29 | 30,8 ± 60,2  | 65,5 ± 6,1   | 58,6 ± 17,2    |
| <b>Total</b>                               | -    | 40,13                        | 830,88        | 123,11       | 221,39         | 36,69       | 96,94        | 405,23       | 297,23         |
| <b>Isothiocyanates</b>                     |      |                              |               |              |                |             |              |              |                |
| 1-Butene, 4-isothiocyanato-                | 998  | 21,1 ± 0,92                  | 214 ± 71,2    | 47,76 ± 0,53 | 1,48 ± 0,09    | 15,8 ± 4,75 | 14,1 ± 9,55  | 15,4 ± 1,07  | 31,7 ± 14,2    |
| Methane, isothiocyanato-                   | 749  | 5,2 ± 0,89                   | - ± -         | 13,1 ± 0,6   | - ± -          | 4,65 ± 0,37 | - ± -        | - ± -        | - ± -          |
| Isopropyl isothiocyanate                   | 832  | - ± -                        | - ± -         | - ± -        | - ± -          | - ± -       | - ± -        | 1,81 ± 0,18  | - ± -          |
| Allyl isothiocyanate                       | 871  | - ± -                        | - ± -         | 5,56 ± 0,04  | 0,24 ± 0,1     | 2,39 ± 0,19 | 3,55 ± 5,18  | 55,2 ± 65,2  | 34,5 ± 6,42    |
| Butane, 2-isothiocyanato-                  | 932  | - ± -                        | 0,97 ± 0,8    | 4,67 ± 0,53  | 0,36 ± 0,26    | 0,27 ± 0    | - ± -        | - ± -        | 0,47 ± 0,24    |
| Isobutyl isothiocyanate                    | 957  | - ± -                        | 4,2 ± 2,26    | - ± -        | 0,33 ± 0,05    | 3,39 ± 0,01 | - ± -        | 26,1 ± 34,79 | - ± -          |
| Butane, 1-isothiocyanato-                  | 1004 | - ± -                        | - ± -         | 6,95 ± 0,61  | - ± -          | 0,54 ± 0,03 | - ± -        | - ± -        | - ± -          |
| 2-Methylbutyl isothiocyanate               | 1066 | 5,16 ± 1,82                  | 11,1 ± 5,93   | 98,82 ± 11   | 1,69 ± 1,02    | 9,2 ± 0,23  | 0,12 ± 0,03  | 9,84 ± 12,45 | 12,8 ± 11      |
| Butane, 1-isothiocyanato-3-methyl-         | 1066 | - ± -                        | - ± -         | 1,99 ± 0,32  | - ± -          | 0 ± 0       | - ± -        | - ± -        | - ± -          |
| n-Pentyl isothiocyanate                    | 1103 | 1,42 ± 0,27                  | 359 ± 118     | 19,23 ± 3,27 | - ± -          | - ± -       | 0,03 ± 0     | - ± -        | 229 ± 102      |
| 4-Methylpentyl isothiocyanate              | 1167 | - ± -                        | - ± -         | 16,36 ± 1,78 | - ± -          | 1,76 ± 0,09 | 0 ± 0        | - ± -        | - ± -          |
| Hexane, 1-isothiocyanato-                  | 1207 | 21,5 ± 0,38                  | 6,5 ± 7,26    | 37,7 ± 6,32  | - ± -          | 11,6 ± 0,42 | - ± -        | 19,8 ± 13,51 | 1,61 ± 2,03    |
| Heptane, 1-isothiocyanato-                 | 1269 | 1,47 ± 0,02                  | - ± -         | 2,5 ± 0,57   | - ± -          | 0,74 ± 0,01 | - ± -        | 0,66 ± 0,4   | ±              |
| Benzene, (isothiocyanatomethyl)-           | 1461 | 1,28 ± 0,01                  | 1,04 ± 0,35   | 26,38 ± 0,05 | - ± -          | 3,24 ± 0,56 | 2,65 ± 1,91  | 1,62 ± 1,6   | 12,2 ± 13,6    |
| Propane, 1-isothiocyanato-3-(methylthio)-  | 1467 | 365 ± 8,09                   | 68,5 ± 38,9   | 299 ± 81,8   | 3,64 ± 1,37    | 276 ± 67,4  | - ± -        | 23,9 ± 12,03 | 89,1 ± 116     |
| Propane, 1-isothiocyanato-                 | 1484 | - ± -                        | - ± -         | - ± -        | - ± -          | - ± -       | - ± -        | - ± -        | - ± -          |
| Octane, 1-isothiocyanato-                  | 1514 | 1,12 ± 0,04                  | - ± -         | 1,05 ± 0,07  | - ± -          | 0,46 ± 0    | - ± -        | 1,29 ± 0,71  | - ± -          |
| 1-Butene, 4-isothiocyanato-1-(methylthio)- | 1534 | 1,37 ± 0,1                   | - ± -         | 3,53 ± 0,01  | - ± -          | 1,05 ± 0,19 | 2,49 ± 1,44  | 1,15 ± 0,5   | ±              |
| Benzene, (2-isothiocyanatoethyl)-          | 1588 | 277 ± 12                     | - ± -         | 764,3 ± 48,5 | 7,94 ± 1,3     | 147 ± 30,4  | 0 ± 0        | 194 ± 72,79  | - ± -          |

| Total                            | -        | 701,6          | 664,95         | 1348,82        | 15,68          | 478,17         | 22,97          | 350,3          | 410,73         |
|----------------------------------|----------|----------------|----------------|----------------|----------------|----------------|----------------|----------------|----------------|
| <b>Other sulfides</b>            |          |                |                |                |                |                |                |                |                |
| Sulfides (di, tri, tetra, penta) | -        | 9305 ± 2203    | 3488 ± 1602    | 3189 ± 118     | 2510 ± 560     | 8890 ± 148     | 1982 ± 398     | 7004 ± 1145,4  | 5428 ± 995     |
| Thiocyanic acid, methyl ester    | 709      | 139 ± 8,54     | 20,4 ± 8,2     | 259,4 ± 9,45   | - ± -          | 127 ± 20,6     | 1,15 ± 1,06    | 418 ± 83,92    | 18 ± 13,4      |
| <b>Total</b>                     | <b>-</b> | <b>9444,06</b> | <b>3508,44</b> | <b>3448,34</b> | <b>2510,28</b> | <b>9017,13</b> | <b>1982,76</b> | <b>7421,75</b> | <b>5445,53</b> |
| <b>Nitriles</b>                  |          |                |                |                |                |                |                |                |                |
| 3-Butenenitrile                  | 621      | - ± -          | 2,54 ± 0,25    | - ± -          | - ± -          | - ± -          | 0 ± 0          | 26,6 ± 22,78   | ±              |
| 2-Pentenenitrile                 | 760      | - ± -          | ±              | 0 ± 0          | - ± -          | - ± -          | 0 ± 0          | - ± -          | 5,18 ± 1,7     |
| Pentanenitrile, 4-methyl-        | 840      | 1,65 ± 0,77    | 8,61 ± 1,81    | 5,54 ± 0,36    | 5,62 ± 0,73    | 1,74 ± 0,27    | 1,66 ± 0,21    | - ± -          | ±              |
| Hexanenitrile                    | 876      | 1,63 ± 0,55    | 4,32 ± 0,82    | 5,72 ± 0,15    | 2,43 ± 0,62    | 2,49 ± 0,11    | 1,43 ± 0,38    | - ± -          | 13,2 ± 4,72    |
| Butanenitrile, 4-(methylthio)-   | 1092     | 244 ± 21,4     | 280 ± 158      | 601,6 ± 80,6   | - ± -          | 349 ± 0,56     | 34 ± 8,3       | 1244 ± 44,95   | 7,57 ± 4,02    |
| Benzyl nitrile                   | 1150     | 2,43 ± 0,05    | 1,53 ± 0,19    | 3,74 ± 0,46    | - ± -          | 4,12 ± 1,01    | 0 ± 0          | 13 ± 5,03      | 275 ± 124      |
| Octanenitrile                    | 1185     | - ± -          | 0,48 ± 0,11    | 1,63 ± 0,39    | - ± -          | 0,99 ± 0,1     | 0 ± 0          | - ± -          | 31,6 ± 45,3    |
| Pentanenitrile, 5-(methylthio)-  | 1209     | 955 ± 141      | 516 ± 113      | 1463 ± 4,35    | - ± -          | 1588 ± 187     | 111 ± 26,9     | - ± -          | 6,29 ± 12,1    |
| Benzenepropanenitrile            | 1250     | 27,4 ± 1,54    | 32,9 ± 5,76    | 116,4 ± 1,45   | 12,5 ± 8,36    | 28,6 ± 1,15    | 0 ± 0          | 31,1 ± 16,03   | 342 ± 295      |
| <b>Total</b>                     | <b>-</b> | <b>1232,55</b> | <b>846,16</b>  | <b>2192,31</b> | <b>20,50</b>   | <b>1975,32</b> | <b>147,82</b>  | <b>1315,07</b> | <b>685,67</b>  |

**Table S4.** Main volatile compounds identified using GC × GC in raw and cooked Brussel sprouts varieties.

| Compound                      | IR       | Peak area (105) |                |                |                |                |               |                |                |                |                 |
|-------------------------------|----------|-----------------|----------------|----------------|----------------|----------------|---------------|----------------|----------------|----------------|-----------------|
|                               |          | Maximus raw     | Maximus cooked | Marte raw      | Marte cooked   | Ajax raw       | Ajax cooked   | Neptuno raw    | Neptuno cooked | Profitus raw   | Profitus cooked |
| <b>Aldehydes</b>              |          |                 |                |                |                |                |               |                |                |                |                 |
| Propanal                      | 517      | 200,96 ± 31,46  | 304,05 ± 152   | 164,5 ± 17,98  | 17,95 ± 8,83   | 154,07 ± 50,81 | 0 ± 0         | 118,94 ± 7,03  | 0 ± 0          | 212,2 ± 14,5   | 0 ± 0           |
| Butanal                       | 560      | 17,51 ± 1,22    | 0 ± 0          | 17,55 ± 2,13   | 0 ± 0          | 15,27 ± 11,32  | 0 ± 0         | 10,27 ± 1      | 0 ± 0          | 34,63 ± 2,54   | 0 ± 0           |
| 2-Butenal                     | 608      | 730,64 ± 52,34  | 266,36 ± 19,7  | 337,5 ± 178,3  | 57,37 ± 11,3   | 161,41 ± 10,24 | 13,03 ± 5,48  | 228,63 ± 29,8  | 57,37 ± 11,3   | 1176 ± 78,1    | 475,2 ± 162,3   |
| Butanal, 2-methyl-            | 632      | 86,97 ± 1,48    | 97,12 ± 24,3   | 129,7 ± 22,25  | 18,17 ± 4,81   | 70,34 ± 33,35  | 6,84 ± 0,95   | 71,07 ± 5,61   | 0 ± 0          | 94,7 ± 0,65    | 18,8 ± 1,13     |
| Pentanal                      | 681      | 0 ± 0           | 337,28 ± 162   | 0 ± 0          | 295,47 ± 47,3  | 0 ± 0          | 114,7 ± 36,6  | 0 ± 0          | 295,5 ± 47,3   | 0 ± 0          | 273,3 ± 13,98   |
| 2-Pentenal, (E)-              | 752      | 213,32 ± 8,03   | 58,56 ± 50,5   | 208 ± 37,85    | 3,82 ± 0,5     | 150,76 ± 152,9 | 2,81 ± 0,79   | 105,45 ± 14,1  | 0 ± 0          | 102,8 ± 18,2   | 9,21 ± 0,77     |
| 3-Hexenal, (Z)-               | 795      | 81,95 ± 4,47    | 2,07 ± 1,27    | 70,87 ± 3,08   | 0,97 ± 0,59    | 55,09 ± 12,26  | 0,56 ± 0,21   | 70,18 ± 6,19   | 0,62 ± 0,33    | 63,82 ± 4,3    | 0,64 ± 0,07     |
| Hexanal                       | 797      | 145,62 ± 37,26  | 860,01 ± 300   | 271,8 ± 24,67  | 147,91 ± 26,2  | 173,25 ± 99,59 | 100,2 ± 16,6  | 434,1 ± 22,6   | 147,9 ± 26,2   | 383 ± 16,7     | 165,8 ± 8,3     |
| 2-Hexenal                     | 852      | 481,2 ± 29,33   | 169,72 ± 16,1  | 230,9 ± 22,1   | 23,8 ± 8,18    | 167,05 ± 65,56 | 21,53 ± 6,62  | 205,71 ± 17,9  | 23,8 ± 8,18    | 269,6 ± 1,37   | 38,81 ± 7,63    |
| 2-Hexenal, (E)-               | 852      | 123,53 ± 5,19   | 169,72 ± 16,1  | 51,34 ± 3,77   | 17,12 ± 5,5    | 37,07 ± 13,84  | 0,56 ± 0,21   | 68,73 ± 14,6   | 21,87 ± 6,68   | 67,45 ± 0,57   | 38,81 ± 7,63    |
| 2,4-Hexadienal, (E,E)-        | 898      | 189,4 ± 3,24    | 25,51 ± 2,26   | 107,1 ± 12,19  | 0 ± 0          | 122,54 ± 47,25 | 0 ± 0         | 160,39 ± 86,1  | 0 ± 0          | 174,1 ± 58,3   | 22,01 ± 8,19    |
| 2-Heptenal, (Z)-              | 959      | 85,15 ± 9,34    | 142,53 ± 71,4  | 38,49 ± 5,02   | 36,33 ± 7,89   | 71,32 ± 29,51  | 0 ± 0         | 69,75 ± 0,06   | 36,33 ± 7,89   | 70,19 ± 0,32   | 56,88 ± 15,85   |
| Benzaldehyde                  | 972      | 1384,5 ± 95,9   | 350,62 ± 88,1  | 1787 ± 191,6   | 139,62 ± 15,5  | 1918,9 ± 599,1 | 86,91 ± 15,1  | 1328,2 ± 101   | 139,6 ± 15,5   | 257,6 ± 54,3   | 80,73 ± 11,74   |
| 2,4-Heptadienal, (E,E)-       | 993      | 212,79 ± 6,02   | 481,66 ± 50,5  | 130 ± 10,45    | 246,38 ± 162   | 216,69 ± 40,87 | 70,95 ± 23,5  | 249,37 ± 111   | 246,4 ± 162    | 139,3 ± 22,2   | 165,8 ± 8,3     |
| Benzeneacetaldehyde           | 1055     | 112,16 ± 18,31  | 36,52 ± 8,61   | 95,48 ± 12,54  | 28,61 ± 3,16   | 130,11 ± 6,26  | 8,66 ± 2,91   | 97,93 ± 2,47   | 34,63 ± 12,2   | 58,44 ± 0,87   | 17,9 ± 2,54     |
| Nonanal                       | 1108     | 61,78 ± 2,67    | 107,36 ± 16,2  | 103,9 ± 18,11  | 107,92 ± 16,5  | 98,61 ± 20,69  | 24,42 ± 7,45  | 113,28 ± 97,5  | 107,9 ± 16,5   | 65,29 ± 8,36   | 71,23 ± 17,16   |
| 2,6-Nonadienal, (E,E)-        | 1158     | 51,25 ± 5,23    | 10,88 ± 1,76   | 51,66 ± 1,59   | 16,5 ± 4,06    | 48,76 ± 9,29   | 5,88 ± 1,56   | 41,66 ± 3,38   | 12,54 ± 6,07   | 108,5 ± 11,5   | 9,26 ± 3,01     |
| Decanal                       | 1209     | 18,2 ± 5,01     | 28,46 ± 4,47   | 18,8 ± 3,7     | 19,26 ± 2,33   | 14,53 ± 1,41   | 4,57 ± 0,97   | 14,8 ± 1,42    | 19,39 ± 8,16   | 21,57 ± 7,13   | 12,59 ± 2,67    |
| 2-Propenal                    | 1250     | 90,1 ± 3,23     | 129,33 ± 70,2  | 113,9 ± 12,24  | 64,61 ± 24,9   | 142,61 ± 20,54 | 0 ± 0         | 92,15 ± 1,36   | 64,61 ± 24,9   | 121,2 ± 31,9   | 69,79 ± 9,92    |
| <b>Total</b>                  | <b>-</b> | <b>4286,99</b>  | <b>3577,76</b> | <b>3928,10</b> | <b>1241,81</b> | <b>3748,32</b> | <b>461,68</b> | <b>3480,63</b> | <b>1208,47</b> | <b>3420,33</b> | <b>1526,75</b>  |
| <b>Isothiocyanates</b>        |          |                 |                |                |                |                |               |                |                |                |                 |
| Cyclopropane, isothiocyanato- | 866      | 0               | 702,1 ± 27,5   | 0 ± 0          | 407,64 ± 94    | 0 ± 0          | 233,5 ± 42,5  | 0 ± 0          | 407,6 ± 94     | 0 ± 0          | 337,5 ± 11,91   |
| Allyl Isothiocyanate          | 871      | 2841,6 ± 58,4   | 7902,8 ± 602   | 2673 ± 1015    | 4959,1 ± 1471  | 2796 ± 284,2   | 2339 ± 264    | 2516,9 ± 420   | 4959 ± 868     | 2701 ± 178     | 1189 ± 226,5    |

|                                                                                            |      |                |                 |                |                |                |                |                |                |                |                |
|--------------------------------------------------------------------------------------------|------|----------------|-----------------|----------------|----------------|----------------|----------------|----------------|----------------|----------------|----------------|
| Isopropyl isothiocyanate                                                                   | 932  | 2,69 ± 0,72    | 7,71 ± 2,21     | 28,09 ± 9,53   | 444,38 ± 18,8  | 25,39 ± 2,87   | 1,11 ± 0,58    | 10,88 ± 0,56   | 12,8 ± 2,78    | 18,43 ± 5,51   | 10,98 ± 1,77   |
| Isobutyl isothiocyanate                                                                    | 957  | 157,73 ± 13,91 | 497,99 ± 22,5   | 329,6 ± 59,26  | 444,38 ± 18,8  | 383,35 ± 75,83 | 154,7 ± 29,3   | 406,22 ± 10,4  | 444,4 ± 18,8   | 165,6 ± 65,9   | 293,2 ± 129,4  |
| Hexane, 1-isocyanato-                                                                      | 971  | 1,61 ± 0,05    | 0,58 ± 0,05     | 1,88 ± 0,14    | 0,86 ± 0,22    | 1,99 ± 1,23    | 0 ± 0          | 2,38 ± 0,78    | 0,63 ± 0,19    | 1,82 ± 0,31    | 0,58 ± 0,07    |
| 1-Butene, 4-isothiocyanato-                                                                | 998  | 859,46 ± 383   | 105,11 ± 83,9   | 461,1 ± 28,94  | 104,68 ± 38,9  | 979,47 ± 53,29 | 18,47 ± 14,5   | 1258,8 ± 276   | 104,7 ± 38,9   | 444,2 ± 300    | 44,4 ± 26,39   |
| 2-Methylbutyl isothiocyanate                                                               | 1066 | 81,7 ± 2,69    | 172,31 ± 41,5   | 141,2 ± 14,83  | 213,74 ± 7,4   | 105 ± 30,3     | 66,21 ± 15,1   | 177,93 ± 18,7  | 213,7 ± 7,4    | 28,27 ± 6,88   | 121,1 ± 31,69  |
| Hexane, 1-isothiocyanato-Benzene, (isothiocyanatomethyl)-Benzene, (2-isothiocyanatoethyl)- | 1269 | 2,28 ± 0,87    | 16,23 ± 12      | 19,4 ± 5,75    | 13,34 ± 3,78   | 46,12 ± 6,51   | 8,4 ± 2,33     | 9,93 ± 0,73    | 65,98 ± 5,84   | 27,28 ± 4,12   | 23,62 ± 3,02   |
|                                                                                            | 1461 | 195,13 ± 65,86 | 570,11 ± 172    | 271,4 ± 77,77  | 33,84 ± 7,79   | 688,14 ± 192,2 | 274,3 ± 139    | 570,92 ± 18,9  | 33,84 ± 7,79   | 6,96 ± 0,98    | 8,9 ± 5,04     |
|                                                                                            | 1588 | 2,64 ± 0,27    | 39,58 ± 15,6    | 29,69 ± 7,94   | 33,84 ± 7,79   | 380,1 ± 100,4  | 47,53 ± 1,37   | 347,32 ± 411   | 280,8 ± 29,9   | 83 ± 42,2      | 53,34 ± 18,49  |
| <b>Total</b>                                                                               | -    | <b>4144,87</b> | <b>10014,57</b> | <b>3954,94</b> | <b>6655,80</b> | <b>5405,53</b> | <b>3143,10</b> | <b>5301,26</b> | <b>6523,55</b> | <b>3476,53</b> | <b>2082,78</b> |
| <b>Other sulfides</b>                                                                      |      |                | ±               |                |                |                | ±              |                |                |                |                |
| Sulfides (di, tri, tetra, penta)                                                           | -    | 476,61 ± 160,7 | 682,18 ± 33,8   | 905,9 ± 256,7  | 752,9 ± 293    | 823,25 ± 83,54 | 293,5 ± 113    | 755,55 ± 270   | 752,9 ± 293    | 1418 ± 150     | 521 ± 119,4    |
| Thiocyanic acid, methyl ester                                                              | 709  | 665,76 ± 0,01  | 153,74 ± 20,2   | 819,6 ± 31,24  | 49,07 ± 10,7   | 454,22 ± 53,92 | 37,49 ± 17,2   | 413,7 ± 14,1   | 49,07 ± 10,7   | 513,2 ± 33     | 44,09 ± 6,85   |
| <b>Total</b>                                                                               | -    | <b>1142,37</b> | <b>835,92</b>   | <b>1725,45</b> | <b>801,97</b>  | <b>1277,47</b> | <b>331,01</b>  | <b>1169,24</b> | <b>801,97</b>  | <b>1931,67</b> | <b>565,06</b>  |
| <b>Nitriles</b>                                                                            |      |                |                 |                |                |                |                |                |                |                |                |
| 2-Butenenitrile                                                                            | 621  | 1170,2 ± 122,3 | 0 ± 0           | 992,2 ± 92,09  | 0 ± 0          | 1043,9 ± 131,5 | 0 ± 0          | 874,74 ± 27,8  | 0 ± 0          | 1023 ± 502     | 0 ± 0          |
| 3-Butenenitrile                                                                            | 621  | 20,68 ± 8,16   | 490,41 ± 57,9   | 13,07 ± 1,96   | 564,75 ± 114   | 13,82 ± 2,67   | 484,3 ± 287    | 6,43 ± 1,05    | 564,8 ± 114    | 5,89 ± 1,15    | 775,4 ± 49,37  |
| Butanenitrile, 3-methyl-                                                                   | 728  | 1011,8 ± 21,11 | 166,18 ± 42,5   | 858,5 ± 87,1   | 283,14 ± 175   | 663,94 ± 199,4 | 62,98 ± 58,4   | 934,64 ± 80,8  | 183 ± 27,2     | 323 ± 255      | 305,9 ± 29,37  |
| Pentanenitrile                                                                             | 760  | 20,65 ± 1,85   | 0 ± 0           | 45,46 ± 1,73   | 0 ± 0          | 11,04 ± 4,17   | 0 ± 0          | 20,78 ± 2,48   | 0 ± 0          | 5,51 ± 4,45    | 0 ± 0          |
| 3-Pentenenitrile                                                                           | 768  | 461,8 ± 37,14  | 0 ± 0           | 294,6 ± 1,41   | 0 ± 0          | 317,02 ± 20,88 | 0 ± 0          | 275,51 ± 28    | 0 ± 0          | 453,4 ± 132    | 0 ± 0          |
| Pentanenitrile, 4-methyl-                                                                  | 867  | 63,64 ± 1,28   | 0 ± 0           | 60,45 ± 9,41   | 0 ± 0          | 32,61 ± 9,18   | 15,98 ± 17     | 64,21 ± 0,98   | 85,94 ± 9,93   | 13,79 ± 12,6   | 125,3 ± 20,56  |
| Hexanenitrile                                                                              | 876  | 199,6 ± 13,42  | 33,42 ± 11,9    | 194,2 ± 35,49  | 76,78 ± 52,7   | 151,17 ± 58,88 | 0 ± 0          | 190,65 ± 66,5  | 63,78 ± 11,6   | 36,89 ± 24,3   | 47,06 ± 2,71   |
| Butanenitrile, 4-(methylthio)-                                                             | 1092 | 45,6 ± 5,39    | 141,47 ± 35,5   | 205 ± 1,76     | 422,15 ± 87,1  | 334,66 ± 59,53 | 47,7 ± 15,6    | 575,58 ± 4,64  | 422,2 ± 87,1   | 173,7 ± 63,6   | 823,6 ± 24,7   |
| Benzyl nitrile                                                                             | 1150 | 2402,8 ± 517,7 | 1008 ± 248      | 1757 ± 505,1   | 47,69 ± 5,41   | 3378,9 ± 608,2 | 1169 ± 836     | 2307,1 ± 25,7  | 47,69 ± 5,41   | 163 ± 48,3     | 51,41 ± 16,82  |
| Octanenitrile                                                                              | 1185 | 4,28 ± 0,18    | 2,23 ± 0,53     | 3,47 ± 0,02    | 1,83 ± 0,81    | 5,02 ± 0,96    | 0 ± 0          | 5,09 ± 0,28    | 3,4 ± 0,74     | 3,43 ± 2,65    | 2,07 ± 0,37    |
| Pentanenitrile, 5-(methylthio)-                                                            | 1209 | 0 ± 0          | 52,42 ± 6,45    | 0 ± 0          | 96,21 ± 36,5   | 0 ± 0          | 0 ± 0          | 0 ± 0          | 96,21 ± 36,5   | 0 ± 0          | 74,17 ± 15,15  |
| Benzenepropanenitrile                                                                      | 1250 | 375,81 ± 2,23  | 179,68 ± 81,4   | 183,3 ± 92,14  | 893,93 ± 190   | 1988,6 ± 101,7 | 247,6 ± 101    | 634,16 ± 124   | 893,9 ± 190    | 200,7 ± 95,4   | 345,1 ± 113,3  |
| Methylalyl cyanide                                                                         |      | 0,73 ± 0,31    | 184,64 ± 15,5   | 1,51 ± 0,68    | 347,71 ± 56    | 1,01 ± 0,77    | 108,3 ± 69,1   | 0,45 ± 0,09    | 347,7 ± 56     | 0,59 ± 0,17    | 276,6 ± 16,57  |
| <b>Total</b>                                                                               | -    | <b>5777,52</b> | <b>2258,48</b>  | <b>4608,80</b> | <b>2734,14</b> | <b>7941,61</b> | <b>2135,50</b> | <b>5889,30</b> | <b>2708,50</b> | <b>2403,00</b> | <b>2826,68</b> |
| <b>Alcohols</b>                                                                            |      |                |                 |                |                |                |                |                |                |                |                |
| 2-Buten-1-ol, (E)-                                                                         | 598  | 17,68 ± 7,09   | 0 ± 0           | 19,07 ± 0,47   | 0 ± 0          | 33,13 ± 24,93  | 0 ± 0          | 32,04 ± 22,3   | 752,9 ± 293    | 20,82 ± 4,01   | 0 ± 0          |
| 1-Penten-3-ol                                                                              | 664  | 103,07 ± 8,5   | 400,63 ± 74,2   | 67,54 ± 4,48   | 80,95 ± 46,2   | 63,81 ± 24,09  | 11,82 ± 3,48   | 70,26 ± 4,3    | 89,85 ± 53,7   | 74,85 ± 2,95   | 35,45 ± 2,15   |
| 2-Penten-1-ol, (Z)-                                                                        | 765  | 1107,2 ± 196,7 | 0 ± 0           | 618,6 ± 94,05  | 0 ± 0          | 579,27 ± 206,8 | 0 ± 0          | 729,37 ± 53,1  | 0 ± 0          | 792,7 ± 156    | 0 ± 0          |
| 3-Hexen-1-ol, (Z)-                                                                         | 859  | 144,97 ± 4,72  | 0 ± 0           | 45,72 ± 2,95   | 0 ± 0          | 39,12 ± 0,84   | 0 ± 0          | 157,64 ± 6,69  | 0 ± 0          | 65,97 ± 21,9   | 0 ± 0          |
| 2-Hexen-1-ol, (E)-                                                                         | 864  | 135,06 ± 44,37 | 0 ± 0           | 217,5 ± 154,6  | 0 ± 0          | 47,35 ± 38,75  | 0 ± 0          | 111,16 ± 32,7  | 0 ± 0          | 81,4 ± 87,4    | 0 ± 0          |
| <b>Total</b>                                                                               | -    | <b>1507,98</b> | <b>400,63</b>   | <b>968,46</b>  | <b>80,85</b>   | <b>762,67</b>  | <b>11,82</b>   | <b>1100,47</b> | <b>842,74</b>  | <b>1035,76</b> | <b>35,45</b>   |
| <b>Others</b>                                                                              |      |                |                 |                |                |                |                |                |                |                |                |
| 2,3-Butanedione                                                                            | 558  | 128,92 ± 9,26  | 101,23 ± 1,2    | 194,4 ± 76,67  | 113,32 ± 35,8  | 36,7 ± 9,76    | 7,87 ± 4,08    | 40,72 ± 3,11   | 39,76 ± 5,28   | 181,9 ± 81,8   | 141,5 ± 44,03  |
| 1-Penten-3-one                                                                             | 670  | 1365,1 ± 4,66  | 36,69 ± 5       | 311,4 ± 29,13  | 0 ± 0          | 343,08 ± 32,44 | 5,07 ± 3,14    | 326,43 ± 129   | 12,55 ± 5,28   | 185,9 ± 72,2   | 8,46 ± 0,78    |
| Furan, 2-ethyl-                                                                            | 695  | 505,39 ± 57,94 | 397,51 ± 91     | 239,5 ± 66,84  | 79,14 ± 79,1   | 214,16 ± 67,67 | 38,59 ± 14,8   | 331,37 ± 50,3  | 66,43 ± 27,4   | 660,4 ± 152    | 105,2 ± 20,58  |
| Furan, 2-pentyl-                                                                           | 996  | 177,1 ± 23,06  | 261,71 ± 37,8   | 178,2 ± 65,57  | 137,9 ± 138    | 346,69 ± 50,88 | 98,96 ± 28,2   | 187,99 ± 49    | 144,3 ± 33,7   | 428,5 ± 8,46   | 145,8 ± 9,14   |
| 3,5-Octadien-2-one, (E,E)-                                                                 | 1073 | 73,17 ± 7,92   | 0 ± 0           | 183,8 ± 4,18   | 0 ± 0          | 481,71 ± 32,9  | 0 ± 0          | 90,86 ± 10,1   | 0 ± 0          | 253,8 ± 111    | 0 ± 0          |
| <b>Total</b>                                                                               | -    | <b>2249,73</b> | <b>797,14</b>   | <b>1107,18</b> | <b>330,36</b>  | <b>1422,34</b> | <b>150,50</b>  | <b>97,7</b>    | <b>263,07</b>  | <b>1710,48</b> | <b>400,89</b>  |

**Table S5.** Compounds and their corresponding numbers used in PCA analysis (Fig. 1).

| compound                                 | number in PCA plot |
|------------------------------------------|--------------------|
| Allyl Isothiocyanate                     | 1                  |
| 1-Butene, 4-isothiocyanato-              | 2                  |
| Isobutyl isothiocyanate                  | 3                  |
| Benzene, (isothiocyanatomethyl)          | 4                  |
| 2-Methylbutyl isothiocyanate             | 5                  |
| Benzene, (2-isothiocyanatoethyl)         | 6                  |
| Isopropyl isothiocyanate                 | 7                  |
| Hexane, 1-isothiocyanato                 | 8                  |
| Hexane, 1-isocyanato                     | 9                  |
| Cyclopropane, isothiocyanato             | 10                 |
| Cyclopentyl isothiocyanate               | 11                 |
| Butane, 2-isothiocyanato                 | 12                 |
| Propane, 1-isothiocyanato                | 13                 |
| Butane, 1-isothiocyanato                 | 14                 |
| 1-Butene, 4-isothiocyanato1-(methylthio) | 15                 |
| 4-Methylpentyl isothiocyanate            | 16                 |
| Butane, 1-isothiocyanato-3-methyl        | 17                 |
| Heptane, 1-isothiocyanato                | 18                 |
| Methane, isothiocyanato                  | 19                 |
| Octane, 1-isothiocyanato-                | 20                 |
| Propane, 1-isothiocyanato-3-(methylthio) | 21                 |
| n-Pentyl isothiocyanate                  | 22                 |
| Propane, 1-isocyanato-2-methyl           | 23                 |
| Sulfides (di, tri, tetra, penta)         | 24                 |
| Thiocyanic acid, methyl ester            | 25                 |
| Thiophene, 2-ethyl                       | 26                 |
| Thiophene, 2-methyl                      | 27                 |
| Thiophene, 2-pentyl                      | 28                 |

|                                   |    |
|-----------------------------------|----|
| S-Methyl methanethiosulphonate    | 29 |
| S-Methyl pentanethioate           | 30 |
| Thiocyanic acid, 2-propenyl ester | 31 |
| 2-Butenal                         | 32 |
| Hexanal                           | 33 |
| 2-Hexenal                         | 34 |
| 2-Pentenal, (E)-                  | 35 |
| Propanal                          | 36 |
| 2,4-Heptadienal, (E,E)            | 37 |
| 2-Propenal                        | 38 |
| NoF4-:F77nanal                    | 39 |
| 2,4-Hexadienal, (E,E)-            | 40 |
| Butanal, 2-methyl-                | 41 |
| Benzeneacetaldehyde               | 42 |
| 3-Hexenal, (Z)-                   | 43 |
| 2-Heptenal, (Z)-                  | 44 |
| 2,6-Nonadienal, (E,E)-            | 45 |
| 2-Hexenal, (E)-                   | 46 |
| Benzaldehyde                      | 47 |
| Butanal                           | 48 |
| Decanal                           | 49 |
| Pentanal                          | 50 |
| Heptanal                          | 51 |
| Octanal                           | 52 |
| 2-Octenal, (E)-                   | 53 |
| 2,4-Nonadienal, (E,E)-            | 54 |
| 2,4-Octadienal, (E,E)-            | 55 |
| 2-Nonenal, (E)-                   | 56 |
| 2-Pentenal, (E)-                  | 57 |
| Butanal, 3-methyl-                | 58 |
| 2,4-Decadienal, (E,E)-            | 59 |
| Benzyl nitrile                    | 60 |
| 2-Butenenitrile                   | 61 |



|                                 |    |
|---------------------------------|----|
| Butanenitrile, 3-methyl-        | 62 |
| Benzenepropanenitrile           | 63 |
| Butanenitrile, 4-(methylthio)-  | 64 |
| 3-Pentenenitrile                | 65 |
| Hexanenitrile                   | 66 |
| Pentanenitrile, 4-methyl-       | 67 |
| Pentanenitrile                  | 68 |
| 3-Butenenitrile                 | 69 |
| Octanenitrile                   | 70 |
| Pentanenitrile, 5-(methylthio)- | 71 |
| Hexanenitrile, 5-methyl-        | 72 |
| Heptanenitrile                  | 73 |
| 2-Penten-1-ol, (Z)-             | 74 |
| 2-Hexen-1-ol, (E)-              | 75 |
| 3-Hexen-1-ol, (Z)-              | 76 |
| 1-Penten-3-ol                   | 77 |
| 2-Buten-1-ol, (E)-              | 78 |
| 1-hexenol                       | 79 |
| 1-pentanol                      | 80 |
| 1-octen-3-ol                    | 81 |
| 1-Penten-3-one                  | 82 |
| Furan, 2-ethyl-                 | 83 |
| Furan, 2-pentyl-                | 84 |
| 3,5-Octadien-2-one, (E,E)-      | 85 |
